# Supplementary material for: Formation of a stable carbon framework in a MnO yolk–shell sphere to achieve exceptional performance for a Li-ion battery anode
Source: Royal Society of Chemistry journal article supplement (doi:10.1039/c5ta03787e), 2015-01-01
Supplement: c5ta03787e1.pdf [file c5ta03787e1.pdf]

## Supporting Information for

# Formation of Stable Carbon Framework in MnO Yolk-Shell Sphere to Achieve Exceptionally Performance for Li-Ion Batteries Anode

Shengbin Wang, Changlei Xiao, Yalan Xing, Huaizhe Xu, Shichao Zhang\*

### Experimental:

#### Synthesis of interdispersed MnO-YS spheres:

Solution A: 1.5 g  $\text{MnSO}_4 \cdot \text{H}_2\text{O}$  and 10 g  $(\text{NH}_4)_2\text{SO}_4$  are dissolved into 200 mL of deionized water. Solution B: 7.9 g  $\text{NH}_4\text{HCO}_3$ , 20 mL ethanol, and 100 mL deionized water. Then, the solution B poured into the solution A with vigorous stirring. The mixture is kept under stirring for 5 h in the room temperature. The white  $\text{MnCO}_3$  spheres are obtained by suction filtration, and dried at  $80^\circ\text{C}$ . Finally, the MnO-YS spheres are obtained by heating at  $700^\circ\text{C}$  for 2 h in an inert gas.

#### Preparation of MnO@CF spheres:

0.2 g MnO-YS spheres and 0.1 g dopamine are dissolved into 100 mL deionized water under stirring for 1 h. Then, Tris-buffer are added to the mixture until  $\text{pH}=8.5$ . The mixed solution is subjected to continuous magnetic stirring at room temperature for 24 h. Afterwards, the precipitates, *i.e.* MnO@polydopamine, were collected by suction filtration, then washed by a large amount of deionized water, and then dried at  $80^\circ\text{C}$ . The resulting sample is heated to  $700^\circ\text{C}$  with following  $\text{N}_2$ , and kept at this temperature for 2 h. The obtained composite was denoted as MnO@CF.

#### Material Characterization:

The obtained samples were characterized by X-ray diffraction (XRD, Rigaku D/Max-2400,  $\text{Cu K}\alpha$ ), scanning electron microscope (SEM, Hitachi S-4800), high-resolution transmission electron microscopes (HRTEM, JEOL JEM-2010), Thermogravimetric analysis (TGA, NETZSCH STA 449C),

Raman spectra (labRAM ARAMIS,  $\lambda=532$  nm) and X-ray photoelectron spectra (XPS, Thermo VG ESCALAB250). The specific surface area determination, pore volume and size analysis are determined by nitrogen adsorption–desorption at 77 K using a Quantachrome Autosorb-1C-VP analyzer. The carbon and nitrogen contents are measured by using a Vario EL cube organic element analyzer.

The electrochemical experiments are examined using Coin-type cells (CR 2032) with lithium foil as the anode. The working electrode is fabricated with 80% MnO@CF or MnO-YS, 10% acetylene black and 10% PVDF binder. The active material loading on copper-foil collector is around  $2 \text{ mg cm}^{-2}$ . Cells are assembled in an argon filled glovebox with electrolyte of  $1 \text{ mol L}^{-1}$  LiPF<sub>6</sub> in ethylene carbonate-ethyl methyl carbonate-dimethyl carbonate (EC-EMC-DMC = 1:1:1, volume ratio) solution and a separator of Celgard 2400. Electrochemical data are collected using LAND CT2001A test system within the potential range of 0.01-3.0 V (*vs.* Li<sup>+</sup>/Li). A CHI 660E electrochemical workstation is employed for cyclic voltammograms (CV) tests at a scan rate of  $0.1 \text{ mV s}^{-1}$  between 0.01 and 3.0 V *vs.* Li<sup>+</sup>/Li. Electrochemical impedance spectra (EIS) are recorded on a Zahner IM6e electrochemical workstation at room temperature, in the frequency range from 1 MHz to 10 mHz.

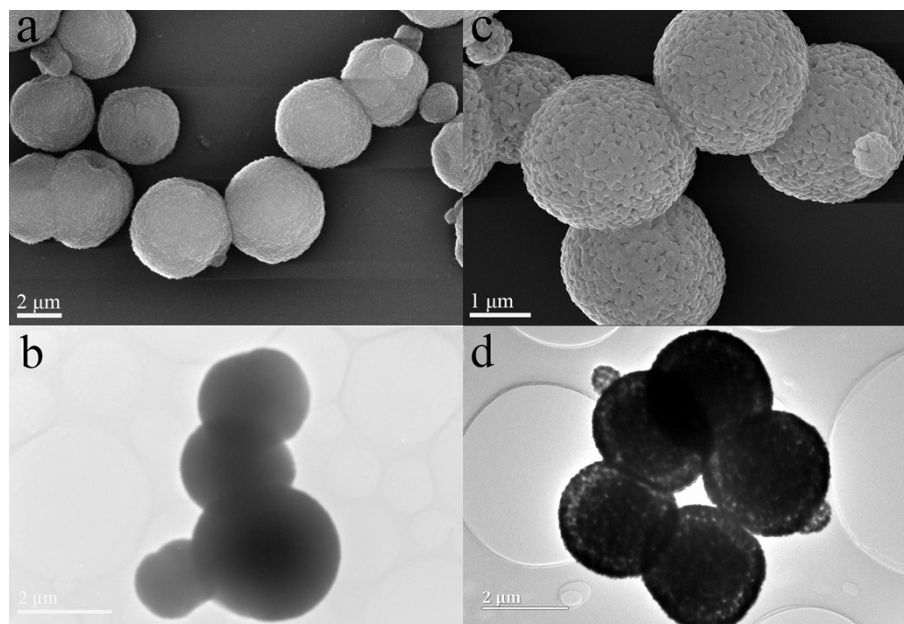

**Fig. S1.** (a) SEM and (b) TEM images of MnCO<sub>3</sub>; (c) SEM and (d) TEM images of MnO-YS.

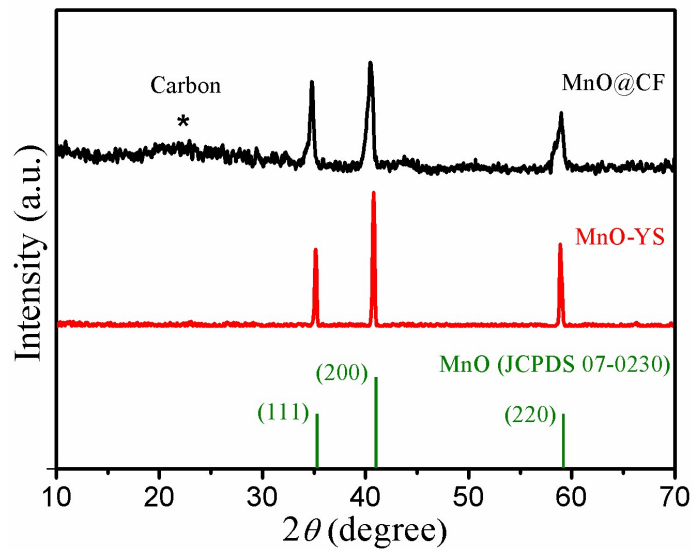

Fig. S2. XRD pattern of MnO@CF and MnO-YS.

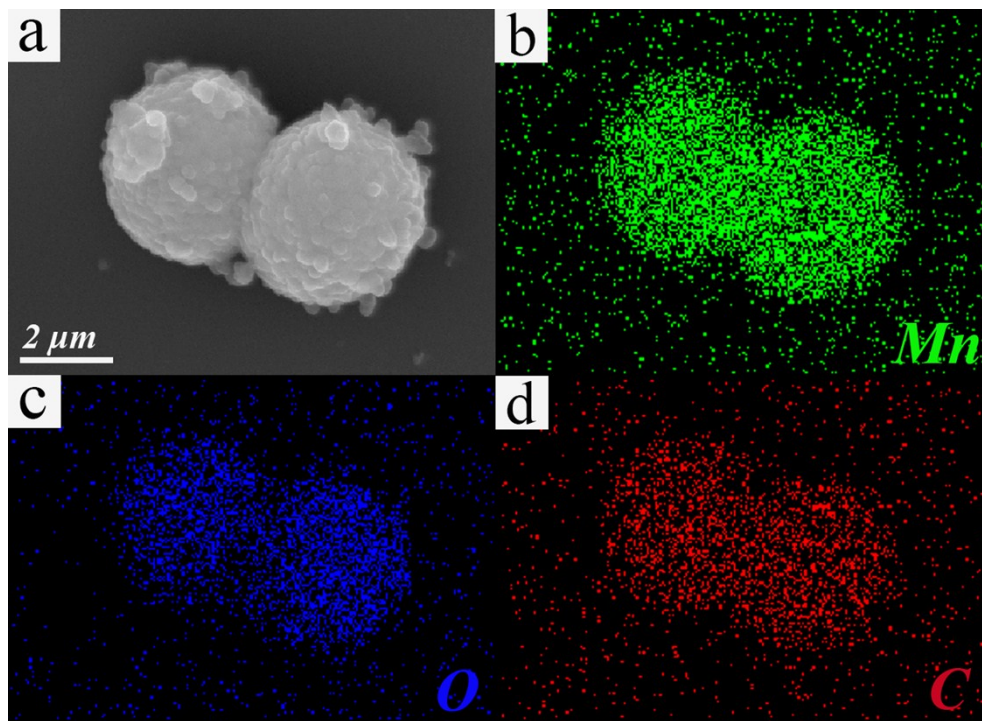

Fig. S3. SEM-EDS mapping image of MnO@CF.

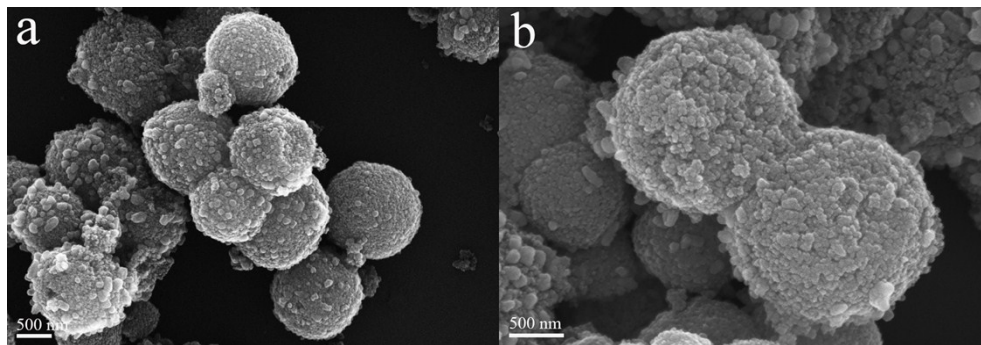

**Fig. S4.** The SEM images of the carbon framework.

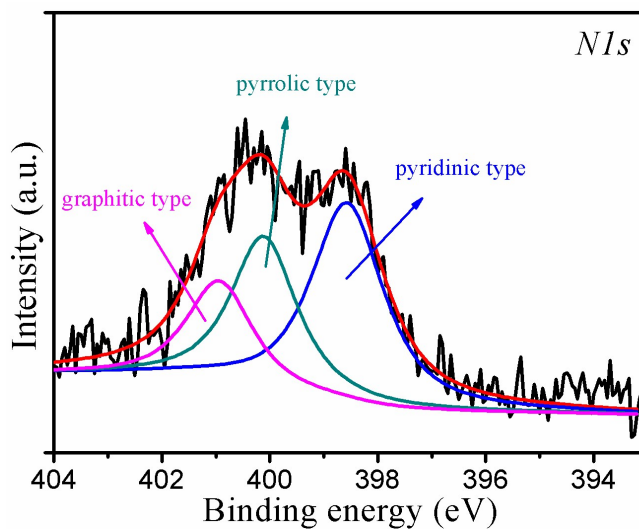

**Fig. S5.** The XPS analysis of N1s peak from the MnO@CF.

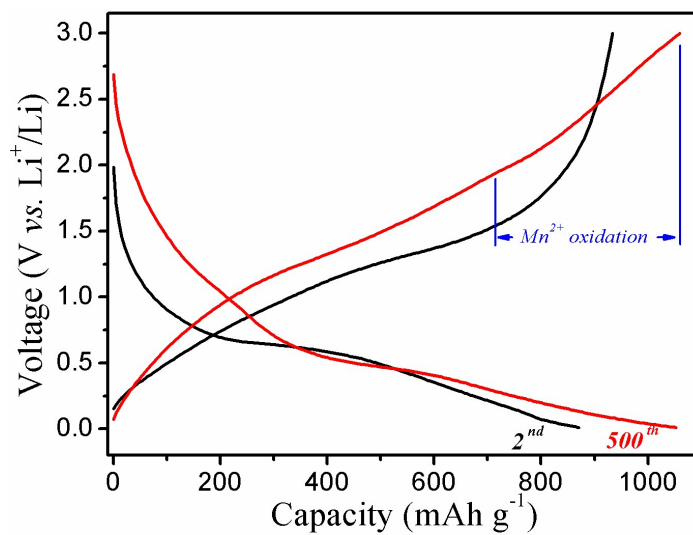

**Fig. S6.** The galvanostatic charge/discharge curves of 2<sup>nd</sup> and 500<sup>th</sup> cycle.

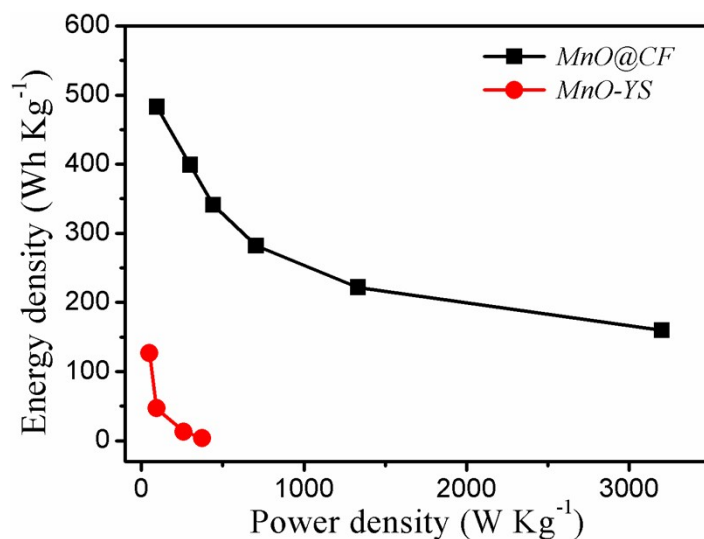

**Fig. S7.** Ragone plot showing the position of the MnO@CF material relative to the MnO-YS.

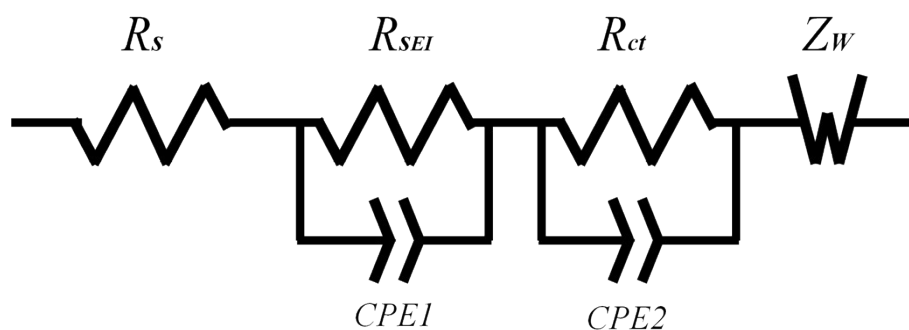

**Fig. S8.** Equivalent circuit used for simulating the experimental impedance data.

**Table S1.** The impedance value of MnO@CF and MnO-YS samples after 10<sup>th</sup> and 100<sup>th</sup> cycles.

| Impedance* | cycles            | $R_s(\Omega)$ | $R_{SEI}(\Omega)$ | $R_{ct}(\Omega)$ |
|------------|-------------------|---------------|-------------------|------------------|
| MnO@CF     | 10 <sup>th</sup>  | 1.7           | 18.8              | 22.3             |
|            | 100 <sup>th</sup> | 1.6           | 17.4              | 21.9             |
| MnO-YS     | 10 <sup>th</sup>  | 6.5           | 51.7              | 148.6            |
|            | 100 <sup>th</sup> | 20.8          | 192.1             | 272.9            |

\*The EIS measurements are all carried out in the frequency range of 1 MHz to 10 mHz at the discharge state (0.01 V) after 10<sup>th</sup> and 100<sup>th</sup> cycles.
